# Supplementary material for: Influence of Gallic Acid-Containing Mouth Spray on Dental Health and Oral Microbiota of Healthy Dogs: A Pilot Study
Source: MDPI journal article supplement (doi:10.3390/vetsci10070424), 2023-06-30
Supplement: s1 [file s1]

**Table S1.** Logan and Boyce index for determining the plaque index.

| Coverage scores |               | Thickness scores |                   |
|-----------------|---------------|------------------|-------------------|
| 0               | None observed | 0                | None observed     |
| 1               | < 25%         | 1 (light)        | Pink to light red |
| 2               | 25 to 49%     | 2 (medium)       | Red               |
| 3               | 50 to 75%     | 3 (heavy)        | Dark red          |
| 4               | >75%          |                  |                   |

**Table S2.** Warrick and Gorrel method to determine the calculus index.

| Coverage scores |               | Thickness scores |               |
|-----------------|---------------|------------------|---------------|
| 0               | None observed | 0                | None observed |
| 1               | < 25%         | 1                | < 0.5 mm      |
| 2               | 25 to 49%     | 2                | 0.5 to 1 mm   |
| 3               | 50 to 75%     | 3                | >1            |
| 4               | >75%          |                  |               |

**Table S3.** Löe and Silness index to determine the gingivitis index.

| Score | Criteria                                                                      |
|-------|-------------------------------------------------------------------------------|
| 0     | No inflammation                                                               |
| 1     | Mild inflammation; Slight color change; Slight edema; No bleeding on probing. |
| 2     | Moderate inflammation; Redness; Bleeding on probing                           |
| 3     | Severe inflammation; Marked redness; Ulceration; Spontaneous bleeding         |

**Table S4.** The estimated sequences in the control and treatment samples.

| Samples-id    | Input  | Filtered | Passed filter (%) | Denoised | Merged | Input merged (%) | non-chimeric | Non-chimeric (%) |
|---------------|--------|----------|-------------------|----------|--------|------------------|--------------|------------------|
| Control       |        |          |                   |          |        |                  |              |                  |
| Cpre-DG1V1-1  | 48812  | 40519    | 83.01             | 39905    | 38532  | 78.94            | 37830        | 77.50            |
| Cpre-DG1V1-4  | 75090  | 59931    | 79.81             | 59016    | 57584  | 76.69            | 56078        | 74.68            |
| Cpre-DG1V1-8  | 67602  | 54111    | 80.04             | 53439    | 51499  | 76.18            | 49814        | 73.69            |
| Cpre-DG3V1-1  | 48493  | 41600    | 85.79             | 40616    | 38429  | 79.25            | 36562        | 75.40            |
| Cpre-DG3V1-2  | 59026  | 48734    | 82.56             | 48174    | 47039  | 79.69            | 45580        | 77.22            |
| Cpre-DG3V1-4  | 73460  | 61594    | 83.85             | 60798    | 58954  | 80.25            | 57028        | 77.63            |
| Cpre-DG3V1-8  | 82927  | 71921    | 86.73             | 71131    | 69636  | 83.97            | 67538        | 81.44            |
| Cpost-DG3V2-1 | 132133 | 107082   | 81.04             | 105846   | 101944 | 77.15            | 93886        | 71.05            |
| Cpost-DG3V2-2 | 35683  | 29194    | 81.81             | 28670    | 27282  | 76.46            | 26255        | 73.58            |
| Cpost-DG3V2-4 | 74497  | 62955    | 84.51             | 61215    | 57183  | 76.76            | 51474        | 69.10            |
| Cpost-DG3V2-8 | 66150  | 55275    | 83.56             | 54170    | 51883  | 78.43            | 47933        | 72.46            |
| Cpost-DG1V2-1 | 51668  | 40954    | 79.26             | 40405    | 39165  | 75.80            | 38250        | 74.03            |
| Cpost-DG1V2-4 | 39927  | 32477    | 81.34             | 32186    | 31366  | 78.56            | 30966        | 77.56            |
| Cpost-DG1V2-8 | 42217  | 34148    | 80.89             | 33803    | 32951  | 78.05            | 32440        | 76.84            |
| Treatment     |        |          |                   |          |        |                  |              |                  |
| Tpre-DG2V1-2  | 52520  | 42389    | 80.71             | 41663    | 40329  | 76.79            | 39054        | 74.36            |
| Tpre-DG2V1-4  | 45590  | 37156    | 81.5              | 36586    | 35705  | 78.32            | 35010        | 76.79            |
| Tpre-DG2V1-8  | 36860  | 30470    | 82.66             | 30045    | 29009  | 78.70            | 28036        | 76.06            |
| Tpre-DG4V1-1  | 41598  | 35358    | 85                | 34631    | 32950  | 79.21            | 31792        | 76.43            |
| Tpre-DG4V1-2  | 55474  | 45746    | 82.46             | 45030    | 43457  | 78.34            | 42254        | 76.17            |
| Tpre-DG4V1-3  | 42917  | 36405    | 84.83             | 35928    | 34870  | 81.25            | 34098        | 79.45            |
| Tpre-DG4V1-4  | 68965  | 57676    | 83.63             | 57057    | 55571  | 80.58            | 54615        | 79.19            |
| Tpost-DG4V2-1 | 53527  | 44781    | 83.66             | 44113    | 42366  | 79.15            | 40355        | 75.39            |
| Tpost-DG4V2-2 | 56669  | 47288    | 83.45             | 46719    | 45057  | 79.51            | 44029        | 77.70            |
| Tpost-DG4V2-3 | 61098  | 48543    | 79.45             | 47621    | 45842  | 75.03            | 42864        | 70.16            |
| Tpost-DG4V2-4 | 63373  | 52860    | 83.41             | 52113    | 50708  | 80.02            | 49699        | 78.42            |
| Tpost-DG2V2-2 | 33941  | 26110    | 76.93             | 25697    | 24898  | 73.36            | 24504        | 72.20            |
| Tpost-DG2V2-4 | 43687  | 36046    | 82.51             | 35428    | 33664  | 77.06            | 31619        | 72.38            |
| Tpost-DG2V2-8 | 39422  | 32600    | 82.69             | 32133    | 30691  | 77.85            | 28721        | 72.86            |

**Table S5.** The average and SD of the relative frequency of taxonomical parameters and their comparison between the groups.

| Taxonomy               | Cpre Vs. Tpre (Mean ± SD) |               | Cpost Vs. Tpost (Mean ± SD) |               | Differences (Mean ± SD) |               | p-value |
|------------------------|---------------------------|---------------|-----------------------------|---------------|-------------------------|---------------|---------|
|                        | Cpre                      | Tpre          | Cpost                       | Tpost         | Control                 | Treatment     |         |
| Phylum                 |                           |               |                             |               |                         |               |         |
| Synergistota           | 10.70 ± 5.71              | 10.22 ± 4.69  | 4.59 ± 5.77                 | 4.60 ± 5.59   | -6.11 ± 5.84            | -5.61 ± 6.71  | 0.848   |
| Proteobacteria         | 24.27 ± 11.94             | 22.75 ± 9.48  | 35.03 ± 14.24               | 35.83 ± 14.85 | 10.76 ± 20.37           | 13.07 ± 18.77 | 0.749   |
| Patescibacteria        | 23.12 ± 4.98              | 23.44 ± 4.47  | 12.09 ± 3.94                | 14.43 ± 3.75  | -11.03 ± 3.18           | -9.00 ± 5.31  | 0.482   |
| Bacteroidota           | 4.78 ± 2.82               | 4.30 ± 1.80   | 11.18 ± 6.55                | 9.67 ± 6.22   | 6.40 ± 6.89             | 5.37 ± 6.94   | 0.749   |
| Actinobacteriota       | 12.64 ± 1.87              | 12.56 ± 1.83  | 16.97 ± 5.32                | 16.42 ± 2.92  | 4.33 ± 5.81             | 3.85 ± 4.26   | 0.949   |
| Fusobacteriota         | 1.40 ± 0.92               | 1.70 ± 1.16   | 2.32 ± 1.80                 | 2.32 ± 1.89   | 0.93 ± 2.14             | 0.61 ± 2.23   | 0.794   |
| Chloroflexi            | 2.25 ± 1.53               | 2.66 ± 1.25   | 0.90 ± 1.10                 | 1.01 ± 1.09   | -1.34 ± 1.65            | -1.65 ± 1.65  | 0.730   |
| Firmicutes             | 16.70 ± 13.43             | 17.81 ± 13.19 | 16.32 ± 10.88               | 15.21 ± 11.76 | -0.38 ± 21.06           | -2.60 ± 21.12 | 0.949   |
| Desulfobacterota       | 3.70 ± 2.23               | 4.04 ± 2.13   | 0.47 ± 0.49                 | 0.42 ± 0.51   | -3.24 ± 1.83            | -3.62 ± 1.71  | 0.655   |
| Campilobacterota       | 0.42 ± 0.41               | 0.43 ± 0.45   | 0.13 ± 0.14                 | 0.08 ± 0.13   | -0.29 ± 0.44            | -0.35 ± 0.53  | 0.848   |
| Genera                 |                           |               |                             |               |                         |               |         |
| <i>Fretibacterium</i>  | 10.94 ± 5.72              | 10.67 ± 4.90  | 4.76 ± 6.04                 | 4.75 ± 5.82   | -6.17 ± 6.05            | -5.92 ± 7.17  | 0.848   |
| <i>Luteimonas</i>      | 6.12 ± 4.16               | 5.20 ± 3.78   | 8.97 ± 7.03                 | 9.51 ± 7.73   | 2.84 ± 6.87             | 4.31 ± 6.99   | 0.848   |
| <i>Candidatus</i>      | 11.94 ± 7.75              | 13.58 ± 5.74  | 2.08 ± 1.88                 | 2.39 ± 1.78   | -9.86 ± 6.37            | -11.18 ± 4.60 | 0.565   |
| <i>Capnocytophaga</i>  | 2.66 ± 1.97               | 2.31 ± 1.38   | 5.13 ± 4.97                 | 4.32 ± 4.75   | 2.47 ± 5.07             | 2.01 ± 4.91   | 0.749   |
| <i>Corticibacter</i>   | 3.15 ± 2.21               | 2.96 ± 2.15   | 4.57 ± 3.18                 | 4.72 ± 3.21   | 1.42 ± 4.00             | 1.76 ± 3.74   | 0.749   |
| <i>Fusobacterium</i>   | 1.14 ± 0.77               | 1.34 ± 0.93   | 1.90 ± 1.83                 | 2.04 ± 1.96   | 0.76 ± 2.12             | 0.70 ± 2.23   | 0.848   |
| <i>TM7x</i>            | 5.88 ± 1.37               | 5.83 ± 1.31   | 5.78 ± 3.42                 | 6.45 ± 2.98   | -0.10 ± 3.78            | 0.62 ± 3.11   | 0.701   |
| <i>Neisseria</i>       | 1.93 ± 1.89               | 2.08 ± 2.01   | 3.70 ± 1.83                 | 3.43 ± 1.99   | 1.77 ± 2.07             | 1.35 ± 2.46   | 0.406   |
| <i>Flexilinea</i>      | 2.31 ± 1.59               | 2.77 ± 1.32   | 0.93 ± 1.14                 | 1.03 ± 1.13   | -1.37 ± 1.74            | -1.73 ± 1.76  | 0.482   |
| <i>Lautropia</i>       | 2.78 ± 2.58               | 3.03 ± 2.95   | 2.63 ± 2.82                 | 2.57 ± 2.61   | -0.14 ± 4.71            | -0.46 ± 4.88  | 0.749   |
| <i>Actinomyces</i>     | 4.94 ± 1.15               | 5.17 ± 1.36   | 7.52 ± 4.71                 | 6.31 ± 3.13   | 2.58 ± 5.28             | 1.14 ± 3.87   | 0.749   |
| <i>W5053</i>           | 2.05 ± 3.31               | 2.22 ± 3.41   | 0.37 ± 0.73                 | 0.41 ± 0.81   | -1.68 ± 3.58            | -1.80 ± 3.73  | 0.848   |
| <i>Frederiksenia</i>   | 1.19 ± 1.41               | 0.74 ± 0.94   | 3.92 ± 4.93                 | 5.01 ± 5.01   | 2.73 ± 4.96             | 4.26 ± 4.66   | 0.482   |
| <i>Corynebacterium</i> | 3.63 ± 1.07               | 3.81 ± 0.97   | 2.99 ± 1.90                 | 2.83 ± 2.0    | -0.64 ± 1.48            | -0.97 ± 1.60  | 0.482   |
| <i>Leucobacter</i>     | 1.88 ± 1.09               | 1.45 ± 0.72   | 2.65 ± 1.96                 | 3.79 ± 3.48   | 0.76 ± 2.45             | 2.34 ± 3.92   | 0.406   |
| <i>Filifactor</i>      | 1.45 ± 2.92               | 1.58 ± 3.03   | 1.35 ± 2.37                 | 1.33 ± 2.43   | -0.10 ± 4.30            | -0.25 ± 4.45  | 0.947   |
| <i>Anaerorhabdus</i>   | 1.38 ± 0.59               | 1.37 ± 0.63   | 2.60 ± 1.60                 | 2.41 ± 1.26   | 1.22 ± 1.68             | 1.04 ± 1.24   | 0.848   |

|                         |             |             |             |             |              |              |       |
|-------------------------|-------------|-------------|-------------|-------------|--------------|--------------|-------|
| <i>Granulicatella</i>   | 0.58 ± 0.57 | 0.74 ± 0.59 | 0.95 ± 1.04 | 0.97 ± 0.96 | 0.37 ± 1.42  | 0.23 ± 1.47  | 0.949 |
| <i>Gracilibacteria</i>  | 2.40 ± 3.15 | 1.20 ± 0.79 | 2.14 ± 2.49 | 3.29 ± 3.73 | -0.26 ± 4.17 | 2.09 ± 3.78  | 0.482 |
| <i>Bergeyella</i>       | 0.72 ± 0.99 | 0.40 ± 0.65 | 2.81 ± 2.76 | 3.27 ± 2.54 | 2.08 ± 2.79  | 2.87 ± 2.38  | 0.565 |
| <i>Brachymonas</i>      | 2.26 ± 1.13 | 2.01 ± 0.77 | 3.73 ± 1.37 | 3.21 ± 1.44 | 1.46 ± 0.98  | 1.19 ± 1.32  | 0.482 |
| <i>Dojkabacteria</i>    | 0.82 ± 0.79 | 1.01 ± 0.79 | 0.52 ± 0.74 | 0.48 ± 0.71 | -0.29 ± 0.81 | -0.53 ± 0.73 | 0.576 |
| <i>Desulfovibrio</i>    | 2.87 ± 2.00 | 3.21 ± 1.85 | 0.16 ± 0.21 | 0.09 ± 0.16 | -2.70 ± 1.89 | -3.11 ± 1.74 | 0.684 |
| <i>Fusibacter</i>       | 1.85 ± 2.46 | 2.14 ± 2.59 | 1.44 ± 1.18 | 1.43 ± 1.2  | -0.40 ± 2.97 | -0.70 ± 3.16 | 0.861 |
| <i>Parvimonas</i>       | 0.89 ± 1.44 | 0.93 ± 1.51 | 0.96 ± 1.58 | 1.07 ± 1.59 | 0.07 ± 2.47  | 0.14 ± 2.58  | 0.961 |
| <i>Comamonas</i>        | 0.76 ± 1.06 | 0.33 ± 0.26 | 0.47 ± 0.40 | 0.44 ± 0.46 | -0.28 ± 1.13 | 0.10 ± 0.59  | 0.565 |
| <i>Desulfohalobium</i>  | 0.74 ± 0.52 | 0.79 ± 0.60 | 0.28 ± 0.41 | 0.31 ± 0.43 | -0.46 ± 0.26 | -0.48 ± 0.34 | 0.893 |
| <i>Eubacterium</i>      | 0.54 ± 0.80 | 0.62 ± 0.82 | 0.23 ± 0.40 | 0.21 ± 0.39 | -0.31 ± 0.98 | -0.41 ± 1.00 | 0.565 |
| <i>Flavobacterium</i>   | 0.10 ± 0.15 | 0.04 ± 0.05 | 0.84 ± 1.53 | 0.77 ± 1.42 | 0.74 ± 1.55  | 0.73 ± 1.42  | 0.848 |
| <i>Tannerella</i>       | 0.37 ± 0.26 | 0.37 ± 0.21 | 0.31 ± 0.19 | 0.29 ± 0.15 | -0.06 ± 0.34 | -0.08 ± 0.27 | 0.655 |
| <i>Fastidiosipila</i>   | 0.40 ± 0.29 | 0.42 ± 0.26 | 0.15 ± 0.25 | 0.16 ± 0.27 | -0.24 ± 0.44 | -0.26 ± 0.44 | 0.942 |
| <i>Selenomonas</i>      | 0.68 ± 0.74 | 0.64 ± 0.78 | 0.55 ± 1.01 | 0.56 ± 0.98 | -0.12 ± 0.52 | -0.08 ± 0.50 | 0.871 |
| <i>Campylobacter</i>    | 0.42 ± 0.44 | 0.44 ± 0.49 | 0.13 ± 0.14 | 0.08 ± 0.13 | -0.29 ± 0.48 | -0.35 ± 0.57 | 0.848 |
| <i>Porphyromonas</i>    | 0.22 ± 0.37 | 0.32 ± 0.60 | 1.11 ± 2.02 | 0.28 ± 0.35 | 0.88 ± 1.66  | -0.03 ± 0.80 | 0.277 |
| <i>Gemella</i>          | 0.15 ± 0.34 | 0.14 ± 0.31 | 0.33 ± 0.60 | 0.30 ± 0.71 | 0.18 ± 0.76  | 0.16 ± 0.83  | 0.963 |
| <i>Leptotrichia</i>     | 0.28 ± 0.25 | 0.42 ± 0.34 | 0.44 ± 0.26 | 0.30 ± 0.21 | 0.16 ± 0.39  | -0.11 ± 0.43 | 0.277 |
| <i>Arenimonas</i>       | 0.40 ± 0.48 | 0.43 ± 0.46 | 0.24 ± 0.41 | 0.24 ± 0.42 | -0.16 ± 0.64 | -0.19 ± 0.64 | 0.942 |
| <i>Streptococcus</i>    | 0.22 ± 0.08 | 0.26 ± 0.09 | 1.24 ± 0.86 | 1.12 ± 0.65 | 1.01 ± 0.89  | 0.86 ± 0.68  | 0.848 |
| <i>Moraxella</i>        | 0.10 ± 0.09 | 0.19 ± 0.21 | 0.37 ± 0.55 | 0.15 ± 0.14 | 0.27 ± 0.56  | -0.04 ± 0.24 | 0.277 |
| <i>Helcococcus</i>      | 0.18 ± 0.17 | 0.22 ± 0.15 | 0.16 ± 0.24 | 0.15 ± 0.21 | -0.02 ± 0.28 | -0.07 ± 0.29 | 0.741 |
| <i>Johnsonella</i>      | 0.42 ± 0.30 | 0.49 ± 0.50 | 0.59 ± 0.75 | 0.99 ± 1.62 | 0.16 ± 0.96  | 0.49 ± 1.91  | 0.949 |
| <i>F0058</i>            | 0.04 ± 0.06 | 0.05 ± 0.07 | 0.29 ± 0.43 | 0.16 ± 0.29 | 0.24 ± 0.45  | 0.10 ± 0.33  | 0.655 |
| <i>UCG-014</i>          | 0.10 ± 0.09 | 0.13 ± 0.08 | 0.15 ± 0.19 | 0.15 ± 0.22 | 0.04 ± 0.25  | 0.01 ± 0.27  | 0.655 |
| <i>Propionivibrio</i>   | 0.14 ± 0.09 | 0.18 ± 0.11 | 0.20 ± 0.12 | 0.21 ± 0.13 | 0.06 ± 0.09  | 0.02 ± 0.12  | 0.565 |
| <i>Proteocatella</i>    | 0.18 ± 0.13 | 0.20 ± 0.16 | 0.18 ± 0.23 | 0.09 ± 0.06 | -0.00 ± 0.28 | -0.11 ± 0.16 | 0.384 |
| <i>Desulfomicrobium</i> | 0.14 ± 0.16 | 0.15 ± 0.19 | 0.02 ± 0.02 | 0.02 ± 0.02 | -0.11 ± 0.15 | -0.13 ± 0.18 | 0.949 |
| <i>Bacteroides</i>      | 0.02 ± 0.02 | 0.05 ± 0.05 | 0.10 ± 0.11 | 0.08 ± 0.11 | 0.07 ± 0.09  | 0.02 ± 0.11  | 0.277 |
| <i>Staphylococcus</i>   | 0.14 ± 0.33 | 0.14 ± 0.31 | 0.01 ± 0.03 | 0.00 ± 0.00 | -0.13 ± 0.33 | -0.14 ± 0.31 | 0.225 |
| <i>Conchiformibius</i>  | 0.20 ± 0.21 | 0.14 ± 0.13 | 0.02 ± 0.03 | 0.02 ± 0.03 | -0.17 ± 0.20 | -0.12 ± 0.13 | 0.848 |
| <i>R-7</i>              | 0.01 ± 0.00 | 0.03 ± 0.02 | 0.04 ± 0.03 | 0.03 ± 0.03 | 0.03 ± 0.03  | 0.00 ± 0.04  | 0.025 |

| Species                    |             |             |              |             |              |              |       |
|----------------------------|-------------|-------------|--------------|-------------|--------------|--------------|-------|
| <i>Cardiobacterium sp.</i> | 3.80 ± 1.94 | 4.11 ± 2.04 | 10.82 ± 5.03 | 5.68 ± 2.61 | 7.01 ± 5.28  | 1.57 ± 2.82  | 0.025 |
| <i>Fusobacterium sp.</i>   | 1.13 ± 0.74 | 1.33 ± 0.91 | 1.93 ± 1.86  | 2.05 ± 1.99 | 0.80 ± 2.12  | 0.72 ± 2.23  | 0.848 |
| <i>N. shayeganii</i>       | 0.81 ± 0.48 | 0.86 ± 0.45 | 2.65 ± 2.00  | 2.64 ± 1.98 | 1.83 ± 2.39  | 1.78 ± 2.31  | 0.848 |
| <i>Lautropia sp.</i>       | 2.87 ± 2.69 | 3.11 ± 3.06 | 2.70 ± 2.92  | 2.62 ± 2.70 | -0.17 ± 4.88 | -0.48 ± 5.04 | 0.749 |
| <i>S. canis</i>            | 2.70 ± 0.81 | 2.74 ± 0.98 | 3.82 ± 1.65  | 3.60 ± 1.00 | 1.12 ± 1.97  | 0.85 ± 1.88  | 0.802 |
| <i>Filifactor alocis</i>   | 1.47 ± 3.12 | 1.55 ± 3.22 | 1.35 ± 2.55  | 1.38 ± 2.64 | -0.11 ± 4.56 | -0.16 ± 4.72 | 0.985 |
| <i>C. canis</i>            | 1.66 ± 1.45 | 1.69 ± 1.25 | 0.33 ± 0.64  | 0.32 ± 0.67 | -1.32 ± 1.45 | -1.36 ± 1.20 | 0.565 |
| <i>B. hordeovulneris</i>   | 1.08 ± 0.48 | 1.27 ± 0.32 | 0.83 ± 0.53  | 0.72 ± 0.37 | -0.24 ± 0.68 | -0.54 ± 0.24 | 0.482 |
| <i>G. coleocanis</i>       | 0.14 ± 0.12 | 0.17 ± 0.15 | 1.80 ± 2.72  | 0.97 ± 1.99 | 1.65 ± 2.69  | 0.80 ± 1.89  | 0.655 |
| <i>B. zoohelcum</i>        | 0.73 ± 0.99 | 0.41 ± 0.66 | 2.82 ± 2.80  | 3.30 ± 2.55 | 2.09 ± 2.81  | 2.89 ± 2.39  | 0.565 |
| <i>Brachymonas sp.</i>     | 2.31 ± 1.16 | 2.04 ± 0.77 | 3.82 ± 1.41  | 3.27 ± 1.47 | 1.51 ± 0.99  | 1.23 ± 1.33  | 0.482 |
| <i>Leucobacter sp.</i>     | 0.86 ± 0.72 | 0.94 ± 0.58 | 0.38 ± 0.63  | 0.46 ± 0.80 | -0.48 ± 0.86 | -0.47 ± 0.94 | 0.996 |
| <i>Globicatella sp.</i>    | 0.69 ± 0.42 | 0.55 ± 0.20 | 1.46 ± 1.12  | 0.92 ± 0.66 | 0.77 ± 0.93  | 0.37 ± 0.74  | 0.338 |
| <i>Petrimonas sp.</i>      | 0.62 ± 0.75 | 0.77 ± 0.72 | 0.28 ± 0.24  | 0.25 ± 0.25 | -0.34 ± 0.57 | -0.52 ± 0.52 | 0.277 |
| <i>Ottowia sp.</i>         | 0.77 ± 1.08 | 0.33 ± 0.26 | 0.48 ± 0.41  | 0.44 ± 0.47 | -0.29 ± 1.15 | 0.10 ± 0.60  | 0.431 |
| <i>A. weissii</i>          | 0.27 ± 0.37 | 0.15 ± 0.2  | 0.68 ± 0.95  | 0.73 ± 0.90 | 0.40 ± 1.13  | 0.57 ± 0.95  | 0.759 |
| <i>Desulfobulbus sp.</i>   | 0.74 ± 0.54 | 0.77 ± 0.61 | 0.26 ± 0.36  | 0.29 ± 0.38 | -0.47 ± 0.29 | -0.48 ± 0.36 | 0.949 |
| <i>C. canimorsus</i>       | 0.27 ± 0.36 | 0.16 ± 0.21 | 1.31 ± 1.52  | 1.49 ± 1.46 | 1.03 ± 1.68  | 1.32 ± 1.53  | 0.949 |
| <i>Capnocytophaga sp.</i>  | 0.10 ± 0.16 | 0.03 ± 0.05 | 0.82 ± 1.56  | 0.76 ± 1.44 | 0.72 ± 1.58  | 0.72 ± 1.44  | 0.655 |
| <i>Neisseria sp.</i>       | 0.58 ± 1.00 | 0.66 ± 0.99 | 0.18 ± 0.25  | 0.17 ± 0.23 | -0.39 ± 1.07 | -0.49 ± 1.06 | 0.749 |
| <i>T. forsythia</i>        | 0.39 ± 0.28 | 0.39 ± 0.2  | 0.32 ± 0.20  | 0.30 ± 0.16 | -0.06 ± 0.37 | -0.08 ± 0.29 | 0.655 |
| <i>Schwartzia sp.</i>      | 0.66 ± 0.73 | 0.64 ± 0.78 | 0.50 ± 0.89  | 0.51 ± 0.87 | -0.16 ± 0.43 | -0.12 ± 0.49 | 0.868 |
| <i>Leptotrichia sp.</i>    | 0.22 ± 0.24 | 0.36 ± 0.35 | 0.33 ± 0.31  | 0.19 ± 0.23 | 0.11 ± 0.46  | -0.17 ± 0.47 | 0.338 |
| <i>S. minor</i>            | 0.07 ± 0.07 | 0.05 ± 0.07 | 0.36 ± 0.38  | 0.56 ± 0.58 | 0.29 ± 0.40  | 0.50 ± 0.58  | 0.406 |
| <i>C. mustelae</i>         | 0.03 ± 0.04 | 0.05 ± 0.06 | 0.71 ± 0.72  | 0.54 ± 0.45 | 0.67 ± 0.73  | 0.49 ± 0.46  | 0.749 |
| <i>Moraxella sp.</i>       | 0.10 ± 0.09 | 0.18 ± 0.22 | 0.38 ± 0.57  | 0.15 ± 0.15 | 0.27 ± 0.57  | -0.03 ± 0.25 | 0.229 |
| <i>Helcococcus sp.</i>     | 0.16 ± 0.18 | 0.20 ± 0.18 | 0.13 ± 0.20  | 0.13 ± 0.18 | -0.02 ± 0.27 | -0.07 ± 0.29 | 0.761 |
| <i>Luteimonas sp.</i>      | 0.25 ± 0.28 | 0.15 ± 0.12 | 0.05 ± 0.06  | 0.04 ± 0.05 | -0.20 ± 0.32 | -0.10 ± 0.17 | 0.749 |
| <i>C. matruchotii</i>      | 0.11 ± 0.11 | 0.14 ± 0.11 | 0.27 ± 0.36  | 0.30 ± 0.39 | 0.16 ± 0.37  | 0.16 ± 0.37  | 1.000 |
| <i>Streptococcus sp.</i>   | 0.14 ± 0.07 | 0.18 ± 0.05 | 0.77 ± 0.88  | 0.45 ± 0.44 | 0.63 ± 0.93  | 0.27 ± 0.46  | 0.565 |
| <i>Eikenella sp.</i>       | 0.18 ± 0.19 | 0.21 ± 0.17 | 0.18 ± 0.24  | 0.19 ± 0.23 | -0.00 ± 0.39 | -0.01 ± 0.39 | 0.949 |
| <i>Propionivibrio sp.</i>  | 0.13 ± 0.09 | 0.17 ± 0.11 | 0.20 ± 0.12  | 0.21 ± 0.13 | 0.06 ± 0.10  | 0.03 ± 0.14  | 0.655 |

|                         |                 |                 |                 |                 |                  |                  |       |
|-------------------------|-----------------|-----------------|-----------------|-----------------|------------------|------------------|-------|
| <i>Frigovirgula sp.</i> | $0.08 \pm 0.07$ | $0.10 \pm 0.09$ | $0.17 \pm 0.21$ | $0.09 \pm 0.06$ | $0.08 \pm 0.24$  | $-0.00 \pm 0.12$ | 0.655 |
| <i>D. orale</i>         | $0.15 \pm 0.16$ | $0.15 \pm 0.20$ | $0.02 \pm 0.02$ | $0.02 \pm 0.02$ | $-0.12 \pm 0.16$ | $-0.13 \pm 0.19$ | 0.949 |
| <i>Tissierella sp.</i>  | $0.01 \pm 0.01$ | $0.01 \pm 0.01$ | $0.19 \pm 0.19$ | $0.10 \pm 0.11$ | $0.17 \pm 0.19$  | $0.09 \pm 0.12$  | 0.406 |
